# Supplementary material for: Multi-classification of high-frequency oscillations in intracranial EEG signals based on CNN and data augmentation
Source: Springer Nature journal article supplement (doi:10.1007/s11760-023-02808-4), 2023-10-26
Supplement: MOESM1 [file 11760_2023_2808_MOESM1_ESM.pdf]

## Supplementary materials

**Table:** Clinical, neuropathological, Electrophysiological and Neuroimaging information of each patient

| Patient | Age (age at onset) | Handiness | Type of seizures                                               | # of depth electr. | MRI                                                                                            |
|---------|--------------------|-----------|----------------------------------------------------------------|--------------------|------------------------------------------------------------------------------------------------|
| NAP     | 42 (6-7)           | R         | Right temporo-perisylvian seizures                             | 11 (R)             | Right hippocampal sclerosis                                                                    |
| SAN     | 24 (15)            | R         | Bilateral temporo-perisylvian seizures with Right predominance | 10 (R)<br>2 (L)    | Normal                                                                                         |
| LEM     | 44 (35)            | L         | Left frontal seizures                                          | 9 (L)<br>2 (R)     | Left mesial frontal signal abnormality near genu of corpus callosum (focal cortical dysplasia) |
| PAQ     | 34 (11)            | R         | Bilateral temporo-frontal seizures with right predominance     | -                  | Cyst in the left hippocampus and enlarged right amygdala                                       |
| MED     | 30 (16)            | R         | Bilateral frontal with right predominance                      | 12(R) 3 (L)        | Normal                                                                                         |
